# Supplementary material for: Unraveling the effect of solvents on the excited state dynamics of C540A by experimental and theoretical study
Source: Royal Society of Chemistry journal article supplement (doi:10.1039/d3ra00259d), 2023-01-01
Supplement: d3ra00259d1.pdf [file d3ra00259d1.pdf]

*Supporting Information for*

Unraveling the effect of solvents on the excited state dynamics of  
C540A by experimental and theoretical study

Jing Ge,<sup>a</sup> Xue-Dong Zhang,<sup>a</sup> Yue Peng,<sup>a</sup> and Xi-Lin Bai<sup>\*a</sup>

<sup>a</sup> *School of Physics and Information Engineering, Key Laboratory of Spectral Measurement and Analysis of Shanxi Province, Shanxi Normal University, Taiyuan 030031, China.*

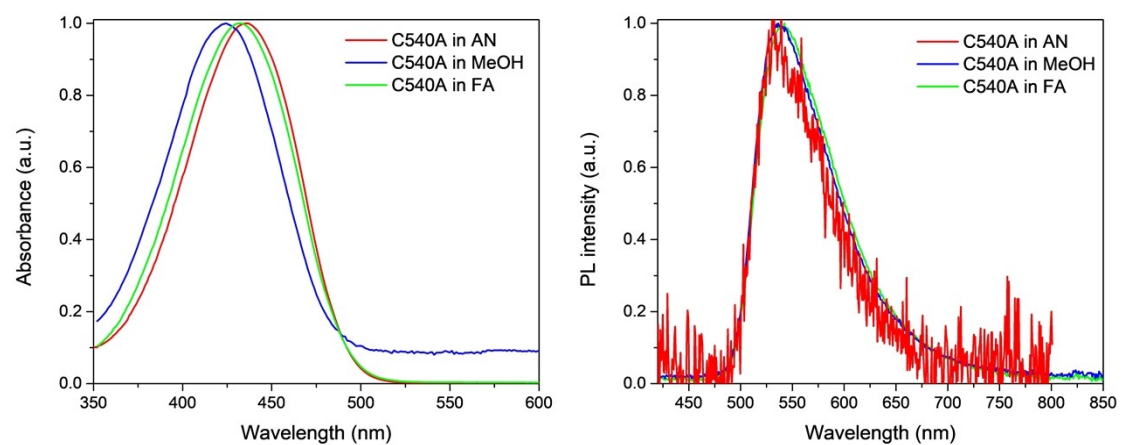

**Figure S1** Normalized steady-state absorption (left) and fluorescence (right) spectra of C540A in AN, MeOH, and FA solvents.

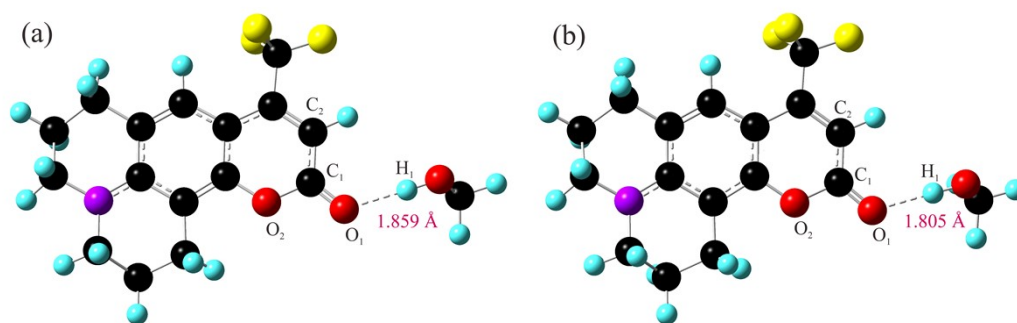

**Figure S2** Optimized geometric structures for the C540A-MeOH complex in S<sub>0</sub> (a) and S<sub>1</sub> (b) at the B3LYP/TZVP/IEF-PCM (MeOH) level.

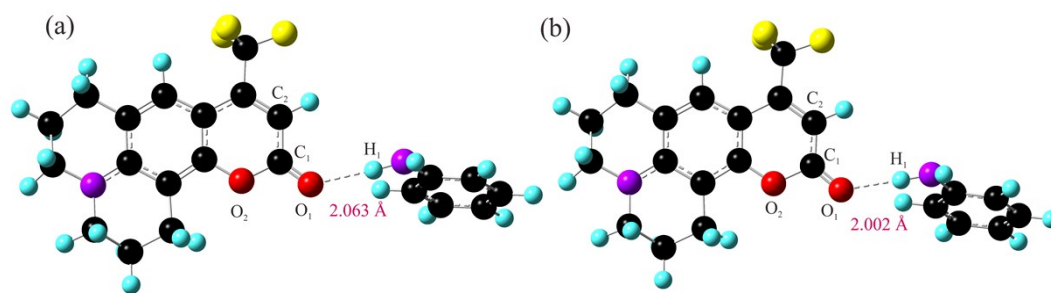

**Figure S3** Optimized geometric structures for the C540A-AN complex in S<sub>0</sub> (a) and S<sub>2</sub> (b) at the B3LYP/TZVP/IEF-PCM (AN) level.

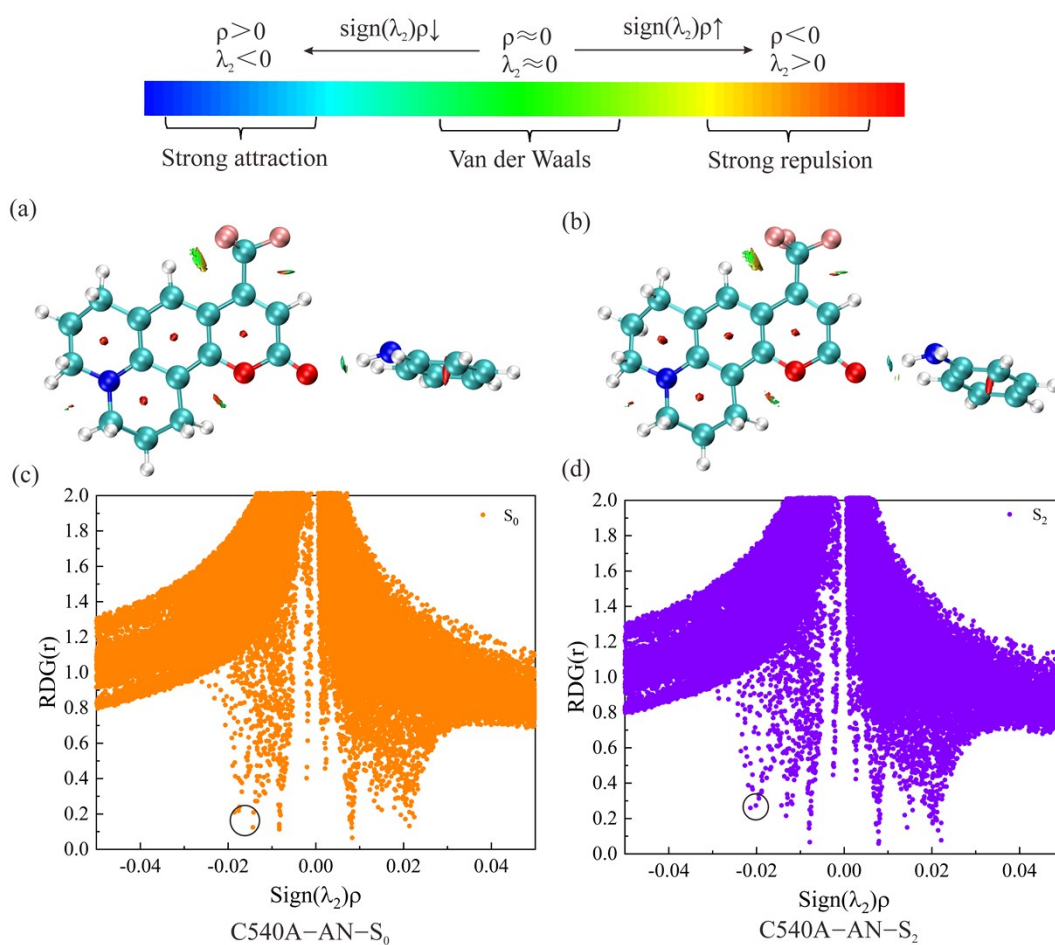

**Figure S4** NCI isosurface of the C540A-AN complex in  $S_0$  (a) and  $S_2$  state (b). Plots of  $\text{Sign}(\lambda_2)$  versus  $\text{RDG}(r)$  for hydrogen-bonded complex C540A-AN in the  $S_0$  (c) and  $S_2$  state (d), respectively.

**Table S1.** Kinetic lifetimes of C540A fitted in FA, AN, and MeOH solvents.

| solvent | $\tau_{\text{rise}}$ (ps) | $\tau_1$ (ps)     | $\tau_2$ (ps)         |
|---------|---------------------------|-------------------|-----------------------|
| FA      | $0.41 \pm 0.02$           | $163.50 \pm 1.33$ | $1688.42 \pm 377.49$  |
| MeOH    | $0.58 \pm 0.01$           | $17.07 \pm 0.83$  | $7626.57 \pm 1826.53$ |
| AN      | $0.65 \pm 0.03$           | $10.90 \pm 2.03$  | $110.97 \pm 3.29$     |

**Table S2.** Infrared spectra of hydrogen bond formation sites ( $\text{cm}^{-1}$ ) of the isolated C540A and hydrogen-bonded complexes in three solvents in ground state and excited state.

| Parameters                     | C540A          |                | C540A-MeOH     |                | C540A-FA       |                | C540A-AN       |                |
|--------------------------------|----------------|----------------|----------------|----------------|----------------|----------------|----------------|----------------|
|                                | S <sub>0</sub> | S <sub>1</sub> | S <sub>0</sub> | S <sub>1</sub> | S <sub>0</sub> | S <sub>1</sub> | S <sub>0</sub> | S <sub>2</sub> |
| C <sub>1</sub> -O <sub>1</sub> | 1799           | 1797           | 1706           | 1702           | 1708           | 1704           | 1726           | 1721           |
